# Supplementary material
Source: ML conference proceedings conference paper supplement (https://proceedings.neurips.cc/paper_files/paper/2021/hash/85dca1d270f7f9aef00c9d372f114482-Abstract.html)
Supplement: Supplementary file 1 [file 85dca1d270f7f9aef00c9d372f114482-Supplemental.pdf]

## Checklist

1. For all authors...
  - (a) Do the main claims made in the abstract and introduction accurately reflect the paper’s contributions and scope? [\[Yes\]](#) See Section 1.
  - (b) Did you describe the limitations of your work? [\[Yes\]](#) See Section 5.
  - (c) Did you discuss any potential negative societal impacts of your work? [\[N/A\]](#) This paper provides theoretical results for fairness guarantee in analysis of incomplete data and the results are not expected to have any negative societal impacts.
  - (d) Have you read the ethics review guidelines and ensured that your paper conforms to them? [\[Yes\]](#)
2. If you are including theoretical results...
  - (a) Did you state the full set of assumptions of all theoretical results? [\[Yes\]](#) The full set of assumptions are stated before the theorems in Section 3.
  - (b) Did you include complete proofs of all theoretical results? [\[Yes\]](#) See Appendix A and B.
3. If you ran experiments...
  - (a) Did you include the code, data, and instructions needed to reproduce the main experimental results (either in the supplemental material or as a URL)? [\[Yes\]](#) The code and instructions as well as a Data Availability statement are included in the supplemental material.
  - (b) Did you specify all the training details (e.g., data splits, hyperparameters, how they were chosen)? [\[Yes\]](#) The information can be found in the description of each experiment in Section 4.
  - (c) Did you report error bars (e.g., with respect to the random seed after running experiments multiple times)? [\[Yes\]](#) They were reported in Table 1, but not in the figures as such error bars make the figures too busy and not easy to read.
  - (d) Did you include the total amount of compute and the type of resources used (e.g., type of GPUs, internal cluster, or cloud provider)? [\[Yes\]](#) Please see Appendix C for the details of resources used. Since we do not propose new algorithms, we do not include running times of those off-the-shelf algorithms in our experiments.
4. If you are using existing assets (e.g., code, data, models) or curating/releasing new assets...
  - (a) If your work uses existing assets, did you cite the creators? [\[Yes\]](#)
  - (b) Did you mention the license of the assets? [\[Yes\]](#) The real data sets used are publicly available and a Data Availability statement is included in the Supplemental material. The licenses of the R packages used in this work can be found in Appendix C.
  - (c) Did you include any new assets either in the supplemental material or as a URL? [\[N/A\]](#)
  - (d) Did you discuss whether and how consent was obtained from people whose data you’re using/curating? [\[N/A\]](#) We used two publicly available, de-identified real datasets. Consent was obtained by the research groups that collected and made the data publicly available.
  - (e) Did you discuss whether the data you are using/curating contains personally identifiable information or offensive content? [\[Yes\]](#) The two real datasets are de-identified and publicly available.
5. If you used crowdsourcing or conducted research with human subjects...
  - (a) Did you include the full text of instructions given to participants and screenshots, if applicable? [\[N/A\]](#)
  - (b) Did you describe any potential participant risks, with links to Institutional Review Board (IRB) approvals, if applicable? [\[N/A\]](#) We used two publicly available, de-identified real datasets. This research does not require IRB review and approval.
  - (c) Did you include the estimated hourly wage paid to participants and the total amount spent on participant compensation? [\[N/A\]](#)

## A Proof of Theorem 1

We begin by stating and proving the following theorem, which will play an important role in the proof of Theorem 1. Suppose we have  $N$  observations  $\{\mathbf{z}_i\}_{i=1}^N$  drawn from an arbitrary domain  $\mathcal{D}_S$  and let

$$\hat{\mathcal{E}}(g, \omega) := \frac{1}{\sum_{i=1}^N R_i} \sum_{i=1}^N R_i \omega(\mathbf{z}_i, A_i) |g(\mathbf{x}_i) - y_i|$$

Furthermore we define  $D^\omega = \mathbb{E}_S \omega(\mathbf{z}, A)^2$ , in this section we use  $\mathbb{E}_S$  to represent that the expectation is taken with respect to this arbitrary domain  $\mathcal{D}_S$ . Then we have the following result:

**Theorem 3.** *Let  $\mathcal{H}$  be a hypothesis set with VC-dimension (pseudo dimension in regression setting)  $d$ . Let  $g$  be an arbitrary prediction model from hypothesis set  $\mathcal{H}$ . If  $D^\omega \leq N/8$ , then, for any  $\delta > 0$ , with probability at least  $1 - \delta$ , the following bound holds:*

$$\left| \mathbb{E}_S \omega(\mathbf{z}, A) |g(\mathbf{x}) - y(\mathbf{x})| - \hat{\mathcal{E}}(g, \omega) \right| \leq \sqrt{\frac{BC_d(N, D^\omega, \delta)}{N \left[ (1 + \frac{D^\omega}{B}) \log(1 + \frac{B}{D^\omega}) - 1 \right]}} \quad (3)$$

$$C_d(N, D^\omega, \delta) = \begin{cases} \log \frac{(d+1)(8e)^{d+1}}{2\delta} + \frac{d}{2} \log \frac{N}{2D^\omega} & \text{if } g \in \{0, 1\} \text{ is a classification model} \\ \log \frac{2}{\delta} \left( \frac{8e}{d} \right)^d + \frac{3d}{2} \log \frac{N}{\sqrt[3]{2D^\omega}} & \text{if } g \in [0, 1] \text{ is a regression model and } N \geq d \end{cases}$$

*Proof.* The proof follows a standard approach in deriving generalization error bound related to VC-dimension (or pseudo-dimension). Recall that an observation  $\mathbf{z} = \{\mathbf{x}, y\}$ , we begin by letting  $f_g(\mathbf{z}) := \omega(\mathbf{z}) |g(\mathbf{x}) - y(\mathbf{x})|$ . Then since  $g \in \mathcal{H}$ , we let  $\mathcal{F}$  denote the set of  $f_g$ . In the rest of the proof, we simply ignore subscription  $g$  and let  $f(\mathbf{z}) := \omega(\mathbf{z}) |g(\mathbf{x}) - y(\mathbf{x})|$ . This is possible since the analysis holds for arbitrary  $g \in \mathcal{H}$ , i.e.  $f \in \mathcal{F}$ . We simplify the notation by defining

$$\hat{\mathcal{E}}(g, \omega) = \mathbb{P}_N f(\mathbf{z})$$

and

$$\mathbb{E}_S \omega(\mathbf{z}) |g(\mathbf{x}) - y(\mathbf{x})| = \mathbb{P} f(\mathbf{z})$$

We further let  $\mathbb{D}_N$  denote the training data  $\{(\mathbf{x}_i, y_i)\}_{i=1}^N$ . We also consider a set of “ghost” sample  $\mathbb{D}'_N = \{(\mathbf{x}'_i, y'_i)\}_{i=1}^N$  with size  $N$ . In reality we do not have access to them but we will make use of them to prove the theorem. We let  $f_N$  be the maximizer of  $|\mathbb{P} f - \mathbb{P}_N f|$  in  $\mathcal{F}$  and  $\sigma^2 = \text{Var}[f_N]$ . Similar to  $\mathbb{P}_N$ , we can define  $\mathbb{P}'_N$  for the ghost samples. Firstly notice that

$$I(|\mathbb{P} f_N - \mathbb{P}_N f_N| > t) I(|\mathbb{P} f_N - \mathbb{P}'_N f_N| < t/2) \leq I(|\mathbb{P}'_N f_N - \mathbb{P}_N f_N| > t/2)$$

Taking expectation with respect to the ghost sample yields

$$I(|\mathbb{P} f_N - \mathbb{P}_N f_N| > t) P_{\mathbb{D}'_N}(|\mathbb{P} f_N - \mathbb{P}'_N f_N| < t/2) \leq P_{\mathbb{D}'_N}(|\mathbb{P}'_N f_N - \mathbb{P}_N f_N| > t/2)$$

Chebyshev's inequality gives

$$P_{\mathbb{D}'_N}(|\mathbb{P} f_N - \mathbb{P}'_N f_N| > t/2) \leq \frac{4\text{Var}[f_N]}{Nt^2} = \frac{4\sigma^2}{Nt^2} \leq \frac{4D^\omega}{Nt^2}$$

where the last inequality is given by the fact that  $D^\omega = \mathbb{E} \omega^2 \geq \text{Var}[f_N] = \sigma^2$  (see Lemma 2 in [13]). This in turn gives

$$I(|\mathbb{P} f_N - \mathbb{P}_N f_N| > t) \left(1 - \frac{4D^\omega}{Nt^2}\right) \leq P_{\mathbb{D}'_N}(|\mathbb{P}'_N f_N - \mathbb{P}_N f_N| > t/2)$$

when  $t \geq \sqrt{\frac{8D^\omega}{N}}$ , we have

$$P\left(\sup_{f \in \mathcal{F}} |\mathbb{P} f - \mathbb{P}_N f| \geq t\right) \leq 2P\left(\sup_{f \in \mathcal{F}} |\mathbb{P}'_N f - \mathbb{P}_N f| \geq t/2\right) \quad (4)$$

We further define  $\mathcal{F}_{|N} = \{(f(\mathbf{x}_1, y_1), \dots, f(\mathbf{x}_N, y_N)) \mid f \in \mathcal{H}\}$ . Then

$$P\left(\sup_{f \in \mathcal{F}} |\mathbb{P}'_N f - \mathbb{P}_N f| \geq t/2\right) = P\left(\sup_{f \in \mathcal{F}_{|2N}} |\mathbb{P}'_N f - \mathbb{P}_N f| \geq t/2\right)$$

Let  $\mathcal{N}_1(t/8, \mathcal{F}, 2N)$  denote the uniform covering number defined as

$$\mathcal{N}_1(t/8, \mathcal{F}, 2N) = \max_{\mathbb{D}_N, \mathbb{D}'_N} \mathcal{N}(t/8, \mathcal{F}_{|2N}, d_1) \quad (5)$$

where  $\mathcal{N}(t/8, \mathcal{F}_{|2N}, d_1)$  is the  $t/8$ -covering number of set  $\mathcal{F}_{|2N}$  with respect to  $L^1$  distance. Now define  $\mathcal{G} \subseteq \mathcal{F}_{|2N}$  as a  $t/8$ -cover of  $\mathcal{F}_{|2N}$  with  $|\mathcal{G}| \leq \mathcal{N}_1(t/8, \mathcal{F}, 2N)$ . Then

$$\begin{aligned} P\left(\sup_{f \in \mathcal{F}_{|2N}} |\mathbb{P}'_N f - \mathbb{P}_N f| \geq t/2\right) &\leq P\left(\sup_{g \in \mathcal{G}} |\mathbb{P}'_N g - \mathbb{P}_N g| \geq t/4\right) \\ &\leq \mathcal{N}_1(t/8, \mathcal{F}, 2N) \sup_{g \in \mathcal{G}} P(|\mathbb{P}'_N g - \mathbb{P}_N g| \geq t/4) \\ &\leq 2\mathcal{N}_1(t/8, \mathcal{F}, 2N) \sup_{g \in \mathcal{G}} P(|\mathbb{P}_N g - \mathbb{P}g| \geq t/8) \end{aligned} \quad (6)$$

Let us first consider the case of classification, in which the predicted outcome  $g(\mathbf{x}) \in \{0, 1\}$ . Then according to classical bound of covering number (Theorem 1 in [25]):

$$\mathcal{N}(t/8, \mathcal{F}_{|2N}, d_1) < e(d+1) \left(\frac{16e}{t}\right)^d$$

The part remained is analysis of the probability  $\sup_{g \in \mathcal{G}} P(|\mathbb{P}_N g - \mathbb{P}g| \geq t/8)$ . Bennett's inequality gives:

$$\sup_{g \in \mathcal{G}} P(|\mathbb{P}_N g - \mathbb{P}g| \geq t/8) \leq \exp\left(\frac{-N\sigma^2 h(Bt/\sigma^2)}{B^2}\right) \quad (7)$$

with  $h(u) := (1+u) \log(1+u) - u$ . Notice that here  $t \leq 1$ , we further have that  $h_{B,\sigma}(t) = h(Bt/\sigma^2)$  is lower bounded by function

$$h(t) = \left[\left(1 + \frac{B}{\sigma^2}\right) \log\left(1 + \frac{B}{\sigma^2}\right) - \frac{B}{\sigma^2}\right] t^2$$

The argument is obtained by observing that  $h(0) = h_{B,\sigma}(0)$ ,  $h(1) = h_{B,\sigma}(1)$ ,  $h(0)' = h_{B,\sigma}(0)'$  and that  $h(0)''$  is decreasing while  $h_{B,\sigma}(0)''$  is a constant. Together with equation (7), we have that

$$\sup_{g \in \mathcal{G}} P(|\mathbb{P}_N g - \mathbb{P}g| \geq t/8) \leq \exp\left(-\frac{N}{B} \left[\left(1 + \frac{\sigma^2}{B}\right) \log\left(1 + \frac{B}{\sigma^2}\right) - 1\right] t^2\right) \quad (8)$$

Combining the bound of covering number yields:

$$\begin{aligned} P\left(\sup_{f \in \mathcal{F}} |\mathbb{P}f - \mathbb{P}_N f| \geq t\right) &< 4e(d+1) \left(\frac{16e}{t}\right)^d \exp\left(-\frac{N}{B} \left[\left(1 + \frac{\sigma^2}{B}\right) \log\left(1 + \frac{B}{\sigma^2}\right) - 1\right] t^2\right) \\ &\leq 4e(d+1) \left(16e\sqrt{\frac{N}{8D^\omega}}\right)^d \exp\left(-\frac{N}{B} \left[\left(1 + \frac{\sigma^2}{B}\right) \log\left(1 + \frac{B}{\sigma^2}\right) - 1\right] t^2\right) \end{aligned} \quad (9)$$

Let  $\delta = 4e(d+1) \left(16e\sqrt{\frac{N}{8D^\omega}}\right)^d \exp\left(-\frac{N}{B} \left[\left(1 + \frac{\sigma^2}{B}\right) \log\left(1 + \frac{B}{\sigma^2}\right) - 1\right] t^2\right)$ . Simplify the equation gives

$$\frac{N}{B} \left[\left(1 + \frac{\sigma^2}{B}\right) \log\left(1 + \frac{B}{\sigma^2}\right) - 1\right] t^2 - C_d(N, D^\omega, \delta) = 0$$

where

$$C_d(N, D^\omega, \delta) = \log \frac{(d+1)(8e)^{d+1}}{2\delta} + \frac{d}{2} \log \frac{N}{2D^\omega}$$

This equation has non-negative solution

$$t_\delta = \sqrt{\frac{BC_d(N, D^\omega, \delta)}{N \left[\left(1 + \frac{\sigma^2}{B}\right) \log\left(1 + \frac{B}{\sigma^2}\right) - 1\right]}}$$

Thus we have

$$1 - \delta \leq P \left( \sup_{f \in \mathcal{F}} |\mathbb{P}f - \mathbb{P}_N f| \leq t_\delta \right) \leq P \left( \sup_{f \in \mathcal{F}} |\mathbb{P}f - \mathbb{P}_N f| \leq \sqrt{\frac{BC_d(N, D^\omega, \delta)}{N \left[ \left(1 + \frac{\sigma^2}{B}\right) \log\left(1 + \frac{B}{\sigma^2}\right) - 1 \right]}} \right)$$

Now we consider the regression case, in which the predicted outcome  $g(\mathbf{x}) \in [0, 1]$  comes from the hypothesis class  $\mathcal{H}$  with pseudo dimension  $d$ . Notice that all the results above hold before equation (6). Now by Theorem 12.2 in [3], we have that

$$\mathcal{N}(t/8, \mathcal{F}_{|2N}, d_1) \leq \mathcal{N}(t/8, \mathcal{F}_{|2N}, d_\infty) \leq \left( \frac{16Ne}{td} \right)^d$$

when  $N \geq d/2$ . Combining with (7) yields

$$\begin{aligned} P \left( \sup_{f \in \mathcal{F}} |\mathbb{P}f - \mathbb{P}_N f| \geq t \right) &< 2 \left( \frac{16Ne}{td} \right)^d \exp \left( -\frac{N}{B} \left[ \left(1 + \frac{\sigma^2}{B}\right) \log\left(1 + \frac{B}{\sigma^2}\right) - 1 \right] t^2 \right) \\ &\leq 2 \left( \frac{16Ne}{d} \sqrt{\frac{N}{8D^\omega}} \right)^d \exp \left( -\frac{N}{B} \left[ \left(1 + \frac{\sigma^2}{B}\right) \log\left(1 + \frac{B}{\sigma^2}\right) - 1 \right] t^2 \right) \end{aligned}$$

Let  $\delta = 2 \left( \frac{16Ne}{d} \sqrt{\frac{N}{8D^\omega}} \right)^d \exp \left( -\frac{N}{B} \left[ \left(1 + \frac{\sigma^2}{B}\right) \log\left(1 + \frac{B}{\sigma^2}\right) - 1 \right] t^2 \right)$  and define

$$C_d(N, D^\omega, \delta) = \log \frac{2}{\delta} \left( \frac{8e}{d} \right)^d + \frac{3d}{2} \log \frac{N}{\sqrt[3]{2D^\omega}}$$

Following exactly the same procedure as above, we can have

$$1 - \delta \leq P \left( \sup_{f \in \mathcal{F}} |\mathbb{P}f - \mathbb{P}_N f| \leq t_\delta \right) \leq P \left( \sup_{f \in \mathcal{F}} |\mathbb{P}f - \mathbb{P}_N f| \leq \sqrt{\frac{BC_d(N, D^\omega, \delta)}{N \left[ \left(1 + \frac{\sigma^2}{B}\right) \log\left(1 + \frac{B}{\sigma^2}\right) - 1 \right]}} \right)$$

Finally, notice that  $D^\omega \geq \sigma^2$  and that  $(1+x) \log(1+1/x)$  is monotonic decreasing, we have that

$$P \left( \sup_{f \in \mathcal{F}} |\mathbb{P}f - \mathbb{P}_N f| \leq \sqrt{\frac{BC_d(N, D^\omega, \delta)}{N \left[ \left(1 + \frac{D^\omega}{B}\right) \log\left(1 + \frac{B}{D^\omega}\right) - 1 \right]}} \right) \geq 1 - \delta$$

for both classification and regression cases. □

Now we are ready to prove Theorem 1:

*Proof.* Notice that for both groups  $a \in \{0, 1\}$ :

$$\left| \mathcal{E}_a(g) - \mathbb{E}_{S_a} \omega(\mathbf{z}, a) |g(\mathbf{x}) - y(\mathbf{x})| \right| = \left| \mathbb{E}_{S_a} (\omega_0(\mathbf{z}, a) - \omega(\mathbf{z}, a)) |g(\mathbf{x}) - y(\mathbf{x})| \right| \quad (10)$$

By triangle inequality, combining (10) in Theorem 3 and (3) yields that with at least probability  $1 - 2\delta$ :

$$\begin{aligned} &\left| \left| \mathcal{E}_0(g) - \mathcal{E}_1(g) \right| - \left| \widehat{\mathcal{E}}_0(g, \omega) - \widehat{\mathcal{E}}_1(g, \omega) \right| \right| \\ &\leq \sum_{a \in \{0, 1\}} \left| \mathbb{E}_{S_a} (\omega_0(\mathbf{z}, a) - \omega(\mathbf{z}, a)) |g(\mathbf{x}) - y(\mathbf{x})| \right| + \left| \mathbb{E}_{S_a} \omega(\mathbf{z}, a) |g(\mathbf{x}) - y(\mathbf{x})| - \widehat{\mathcal{E}}_a(g, \omega) \right| \\ &\leq \sum_{a \in \{0, 1\}} \left| \mathbb{E}_{S_a} (\omega_0(\mathbf{z}, a) - \omega(\mathbf{z}, a)) |g(\mathbf{x}) - y(\mathbf{x})| \right| + \sqrt{\frac{BC_d(n_a, D_a^\omega, \delta)}{n_a \left[ \left(1 + \frac{D_a^\omega}{B}\right) \log\left(1 + \frac{B}{D_a^\omega}\right) - 1 \right]}} \end{aligned} \quad (11)$$

Notice that by definition of total variation distance:

$$d_{\text{TV}}(\mathcal{D}_{T_a} || \omega \mathcal{D}_{S_a}) \geq \left| \mathbb{E}_{S_a} (\omega_0(\mathbf{z}, a) - \omega(\mathbf{z}, a)) |g(\mathbf{x}) - y(\mathbf{x})| \right|$$

Finally substituting  $\delta$  to  $\delta/2$  yields the result. □

## B Proof of Theorem 2

*Proof.* Since we have  $\omega = \omega_0$ , we only use  $\omega$  in the proof for the sake of simplicity. The proof is inspired by the technique used in Theorem 9 in [13]. Assume  $(\mathbf{x}, y) = \{(\mathbf{x}_i, y_i)\}_{i=1}^{n_0+n_1}$  is the complete cases, in which  $n_0$  of the data belongs to sensitive group  $A = 0$ . Let

$$\begin{aligned}\phi_g(\mathbf{x}, y) &= \widehat{\mathcal{E}}_0(g, \omega) - \widehat{\mathcal{E}}_1(g, \omega) \\ &= \frac{1}{n_0} \sum_{i=1}^{n_0} \omega((\mathbf{x}_{0,i}, y_{0,i}), 0) |g(\mathbf{x}_{0,i}) - y_{0,i}| - \frac{1}{n_1} \sum_{i=1}^{n_1} \omega((\mathbf{x}_{1,i}, y_{1,i}), 1) |g(\mathbf{x}_{1,i}) - y_{1,i}|\end{aligned}$$

with  $g \in \mathcal{H}$ . Obviously when true weights are adopted, we have  $\mathbb{E}\phi_g(\mathbf{x}, y) = \mathcal{E}_0(g) - \mathcal{E}_1(g)$ . Without loss of generality, we assume  $n_0 < n_1$ . We let  $\sigma_i^2 := \text{Var}_{S_i}(\omega |g - y|)$ . Furthermore let  $\sigma^2 = \sigma_0^2 + (n_0/n_1)\sigma_1^2$ . Now consider  $U := \frac{\mathbb{E}\phi_g(\mathbf{x}, y) - \phi_g(\mathbf{x}, y)}{\sigma}$ . Notice that

$$\mathbb{E}Z^2 = \frac{\frac{1}{n_0}\sigma_0^2 + \frac{1}{n_1}\sigma_1^2}{\sigma^2} = \frac{1}{n_0} \quad (12)$$

Meanwhile we can split the expectation into

$$\mathbb{E}U^2 \mathbf{1}_{|U| \in [0, 1/(k\sqrt{n_0})]} + \mathbb{E}U^2 \mathbf{1}_{|U| \in [1/(k\sqrt{n_0}), u/\sqrt{n_0})} + \mathbb{E}U^2 \mathbf{1}_{|U| \in [u/\sqrt{n_0}, +\infty)}$$

which is upper bounded by

$$\frac{1}{k^2 n_0} + \frac{u^2}{n_0} P(u/\sqrt{n_0} > |U| > 1/(k\sqrt{n_0})) + \mathbb{E}U^2 \mathbf{1}_{|U| \in [u/\sqrt{n_0}, +\infty)}$$

Combined with (12) yields

$$P(u/\sqrt{n_0} > |U| > 1/(k\sqrt{n_0})) \geq \frac{k^2 - 1}{k^2 u^2} - \frac{n_0}{u^2} \mathbb{E}U^2 \mathbf{1}_{|U| \in [u/\sqrt{n_0}, +\infty)} \quad (13)$$

Now notice that  $n_0 \mathbb{E}U^2 \mathbf{1}_{|U| \in [u/\sqrt{n_0}, +\infty)}$  can be written as

$$\begin{aligned}n_0 \mathbb{E}U^2 \mathbf{1}_{|U| \in [u/\sqrt{n_0}, +\infty)} &= \int_0^{+\infty} P\left[n_0 |U|^2 \mathbf{1}_{|U| > \frac{u}{\sqrt{n_0}}} > t\right] dt \\ &= \int_0^{u^2} P\left[|U| > \frac{u}{\sqrt{n_0}}\right] dt + \int_{u^2}^{+\infty} P\left[|U| > \sqrt{\frac{t}{n_0}}\right] dt \\ &= u^2 P\left[|U| > \frac{u}{\sqrt{n_0}}\right] + \int_{u^2}^{+\infty} P\left[|U| > \sqrt{\frac{t}{n_0}}\right] dt\end{aligned} \quad (14)$$

The probability in the last line can be upper bounded by

$$\begin{aligned}P\left[|U| > \sqrt{\frac{t}{n_0}}\right] &\leq P\left[\left|\left(\frac{1}{n_0} \sum_{i=1}^{n_0} \omega(\mathbf{x}_{0,i}, y_{0,i}) |g(\mathbf{x}_{0,i}) - y_{0,i}| - \mathbb{E}_{S_0} \omega(\mathbf{z}, 0) |g(\mathbf{x}) - y|\right)\right| > \frac{\sigma}{2} \sqrt{\frac{t}{n_0}}\right] \\ &+ P\left[\left|\left(\frac{1}{n_1} \sum_{i=1}^{n_1} \omega(\mathbf{x}_{1,i}, y_{1,i}) |g(\mathbf{x}_{1,i}) - y_{1,i}| - \mathbb{E}_{S_1} \omega(\mathbf{z}, 1) |g(\mathbf{x}) - y|\right)\right| > \frac{\sigma}{2} \sqrt{\frac{t}{n_0}}\right] \\ &\leq \exp\left(-\frac{\sigma^2 t}{8\sigma_0^2 + 4/3B\sigma\sqrt{\frac{t}{n_0}}}\right) + \exp\left(-\frac{(n_1/n_0)\sigma^2 t}{8\sigma_1^2 + 4/3B\sigma\sqrt{\frac{t}{n_0}}}\right)\end{aligned}$$

where the second inequality is given by Bernstein's inequality. We now state that

$$\frac{(n_1/n_0)\sigma^2 t}{8\sigma_1^2 + 4/3B\sigma\sqrt{\frac{t}{n_0}}} \geq \frac{t}{8 + 4/3\sqrt{t}}$$

To see this, consider two cases  $\sigma > \sigma_1$  and  $\sigma \leq \sigma_1$ . If  $\sigma > \sigma_1$  then

$$\frac{(n_1/n_0)\sigma^2 t}{8\sigma_1^2 + 4/3B\sigma\sqrt{\frac{t}{n_0}}} \geq \frac{\sigma^2 t}{8\sigma^2 + 4/3B\sigma\sqrt{\frac{t}{n_0}}} \geq \frac{t}{8 + 4/3\sqrt{t}}$$

where the second inequality is given by the assumption  $B^2/\sigma^2 \leq n_0$ . If  $\sigma \leq \sigma_1$

$$\frac{(n_1/n_0)\sigma^2 t}{8\sigma_1^2 + 4/3B\sigma\sqrt{\frac{t}{n_0}}} = \frac{t((n_1/n_0)\sigma_0^2 + \sigma_1^2)}{8\sigma_1^2 + 4/3B\sigma\sqrt{\frac{t}{n_0}}} \geq \frac{t\sigma_1^2}{8\sigma_1^2 + 4/3B\sigma_1^2\sqrt{\frac{t}{n_0}}} \geq \frac{t}{8 + 4/3\sqrt{t}}$$

Similarly  $\frac{\sigma^2 t}{8\sigma_0^2 + 4/3B\sigma\sqrt{\frac{t}{n_0}}} \geq \frac{t}{8 + 4/3\sqrt{t}}$ . Notice that  $\sqrt{t} \geq 1/k$ , take  $k = 24$ , we have

$$P\left[|U| > \sqrt{\frac{t}{n_0}}\right] \leq 2 \exp\left(-\frac{t}{8 + 4/3\sqrt{t}}\right) \leq 2 \exp\left(-\frac{3\sqrt{t}}{5}\right) \quad (15)$$

Plug into (14) gives that

$$\begin{aligned} n_0 \mathbb{E} U^2 \mathbf{1}_{|U| \in [u/\sqrt{n_0}, +\infty)} &\leq 2u^2 \exp\left(-\frac{3u}{5}\right) + \int_{u^2}^{+\infty} 2 \exp\left(-\frac{3\sqrt{t}}{5}\right) dt \\ &= 2 \left(u^2 + \frac{10u}{3} + 2\left(\frac{5}{3}\right)^2\right) \exp\left(-\frac{3u}{5}\right) \end{aligned}$$

when  $u = 12$ , above is smaller than 0.29. In this case, (13) yields

$$P(|U| > 1/(24\sqrt{n_0})) > P(u/\sqrt{n_0} > |U| > 1/(24\sqrt{n_0})) = \frac{575}{576u^2} - \frac{0.29}{u^2} = \frac{7}{10u^2} = \frac{7}{10} \left(\frac{1}{12}\right)^2 \quad (16)$$

Finally we have the observation

$$P(|U| > 1/(24\sqrt{n_0})) = P\left[\left|(\mathcal{E}_0(g) - \mathcal{E}_1(g)) - (\hat{\mathcal{E}}_0(g, \omega) - \hat{\mathcal{E}}_1(g, \omega))\right| > \frac{1}{24} \sqrt{\frac{\sigma_0^2}{n_0} + \frac{\sigma_1^2}{n_1}}\right]$$

which completes the proof of first argument. To see the second argument, it can be proven that when

$$\hat{\Delta}_S(g, \omega) \geq \frac{13}{2} \sqrt{\frac{\sigma_0^2(g, \omega)}{n_0} + \frac{\sigma_1^2(g, \omega)}{n_1}} > \frac{u + 1/24}{2} \sqrt{\frac{\sigma_0^2(g, \omega)}{n_0} + \frac{\sigma_1^2(g, \omega)}{n_1}}$$

the interval  $[\hat{\Delta}_S(g, \omega) - u/\sqrt{n_0}, \hat{\Delta}_S(g, \omega) + u/\sqrt{n_0}]$  will never intersect with the interval  $[-\hat{\Delta}_S(g, \omega) - 1/(24\sqrt{n_0}), -\hat{\Delta}_S(g, \omega) + 1/(24\sqrt{n_0})]$ . Hence we have

$$P\left[\left|\Delta_T(g) - \hat{\Delta}_S(g, \omega)\right| > \frac{1}{24} \sqrt{\frac{\sigma_0^2(g, \omega)}{n_0} + \frac{\sigma_1^2(g, \omega)}{n_1}}\right] > P(u/\sqrt{n_0} > |U| > 1/(24\sqrt{n_0}))$$

The third argument can be proved in a similar way: when  $\hat{\Delta}_S(g, \omega) \leq \frac{1}{72} \sqrt{\frac{\sigma_0^2(g, \omega)}{n_0} + \frac{\sigma_1^2(g, \omega)}{n_1}}$ , we have that

$$\begin{aligned} \left|\Delta_T(g) - \hat{\Delta}_S(g, \omega)\right| &\geq \left|(\mathcal{E}_0(g) - \mathcal{E}_1(g)) - (\hat{\mathcal{E}}_0(g, \omega) - \hat{\mathcal{E}}_1(g, \omega))\right| - 2\hat{\Delta}_S(g, \omega) \\ &\geq \frac{1}{72} \sqrt{\frac{\sigma_0^2(g, \omega)}{n_0} + \frac{\sigma_1^2(g, \omega)}{n_1}} \end{aligned}$$

□

At the end of this section, we would like to provide a brief discussion about the case when the true weights  $\omega_0$  are estimated by  $\omega$ , from a correctly-specified propensity score model. In this case, we apply Theorem 2 to  $w$  and obtain that:

$$\begin{aligned} &\left|(\mathbb{E}_{S_0} \omega(\mathbf{x}, 0)|g(\mathbf{x}) - y(\mathbf{x})| - \mathbb{E}_{S_1} \omega(\mathbf{x}, 1)|g(\mathbf{x}) - y(\mathbf{x})|) - (\hat{\mathcal{E}}_0(g, \omega) - \hat{\mathcal{E}}_1(g, \omega))\right| \\ &\geq \frac{1}{24} \sqrt{\frac{\sigma_0^2(g, \omega)}{n_0} + \frac{\sigma_1^2(g, \omega)}{n_1}} \end{aligned} \quad (17)$$

with probability at least  $\frac{7}{10}(\frac{1}{12})^2$ . We make two additional assumptions:

- The propensity score model is correctly specified and satisfies:  $|\omega - \omega_0| = \mathcal{O}_p((n_0 + n_1)^{-1/2})$
- The prediction model satisfies that for arbitrary  $\mathbf{x}$ ,  $\mathbb{E}|g(\mathbf{x}) - y(\mathbf{x})| \xrightarrow{P} 0$  where the expectation is taken with respect to  $y$  given  $\mathbf{x}$ .

From above we have that  $D_a^\omega - D_a^{\omega_0} = \mathbb{E}_{S_a} \omega^2 - \mathbb{E}_{S_a} \omega_0^2 = \mathcal{O}_p((n_0 + n_1)^{-1/2})$  for both groups  $a \in \{0, 1\}$ . This yields

$$\sqrt{\frac{\sigma_0^2(g, \omega)}{n_0} + \frac{\sigma_1^2(g, \omega)}{n_1}} = \sqrt{\frac{\sigma_0^2(g, \omega_0)}{n_0} + \frac{\sigma_1^2(g, \omega_0)}{n_1}} + o_p(n_0^{-1/2} + n_1^{-1/2}) \quad (18)$$

Meanwhile, we have

$$\left| \mathbb{E}_{S_a} \omega(\mathbf{x}, a) |g(\mathbf{x}) - y(\mathbf{x})| - \mathcal{E}_a(g) \right| = \left| \mathbb{E}_{S_a} (\omega - \omega_0) |g(\mathbf{x}) - y(\mathbf{x})| \right| = o_p((n_0 + n_1)^{-1/2}) \quad (19)$$

for both groups. Therefore,

$$\begin{aligned} & \left| \left( \mathcal{E}_0(g) - \mathcal{E}_1(g) \right) - \left( \widehat{\mathcal{E}}_0(g, \omega) - \widehat{\mathcal{E}}_1(g, \omega) \right) \right| \\ &= \left| \left( \mathbb{E}_{S_0} \omega_0(\mathbf{x}, 0) |g(\mathbf{x}) - y(\mathbf{x})| - \mathbb{E}_{S_1} \omega_0(\mathbf{x}, 1) |g(\mathbf{x}) - y(\mathbf{x})| \right) - \left( \widehat{\mathcal{E}}_0(g, \omega) - \widehat{\mathcal{E}}_1(g, \omega) \right) \right| \\ &\geq \left| \left( \mathbb{E}_{S_0} (\omega(\mathbf{x}, 0) - \omega_0(\mathbf{x}, 0)) |g(\mathbf{x}) - y(\mathbf{x})| - \mathbb{E}_{S_1} (\omega(\mathbf{x}, 1) - \omega_0(\mathbf{x}, 1)) |g(\mathbf{x}) - y(\mathbf{x})| \right) \right| \\ &\quad - \left| \left( \mathbb{E}_{S_0} \omega(\mathbf{x}, 0) |g(\mathbf{x}) - y(\mathbf{x})| - \mathbb{E}_{S_1} \omega(\mathbf{x}, 1) |g(\mathbf{x}) - y(\mathbf{x})| \right) - \left( \mathcal{E}_0(g) - \mathcal{E}_1(g) \right) \right| \\ &\geq \left| \left( \mathbb{E}_{S_0} (\omega(\mathbf{x}, 0) - \omega_0(\mathbf{x}, 0)) |g(\mathbf{x}) - y(\mathbf{x})| - \mathbb{E}_{S_1} (\omega(\mathbf{x}, 1) - \omega_0(\mathbf{x}, 1)) |g(\mathbf{x}) - y(\mathbf{x})| \right) \right| \\ &\quad + \frac{1}{24} \sqrt{\frac{\sigma_0^2(g, \omega)}{n_0} + \frac{\sigma_1^2(g, \omega)}{n_1}} \end{aligned}$$

where the last inequality holds with probability at least  $\frac{7}{1440}$ . Combining equation (18) and (19), we know that for arbitrary  $\delta$ , there exists  $N_0$  and  $N_1$  such that whenever  $n_0 > N_0$  and  $n_1 > N_1$ , with probability at least  $1 - \delta$ ,

$$\begin{aligned} & \left| \left( \mathbb{E}_{S_0} (\omega(\mathbf{x}, 0) - \omega_0(\mathbf{x}, 0)) |g(\mathbf{x}) - y(\mathbf{x})| - \mathbb{E}_{S_1} (\omega(\mathbf{x}, 1) - \omega_0(\mathbf{x}, 1)) |g(\mathbf{x}) - y(\mathbf{x})| \right) \right| \\ &\leq \frac{1}{24} \sqrt{\frac{\sigma_0^2(g, \omega)}{n_0} + \frac{\sigma_1^2(g, \omega)}{n_1}} - \frac{1}{25} \sqrt{\frac{\sigma_0^2(g, \omega_0)}{n_0} + \frac{\sigma_1^2(g, \omega_0)}{n_1}} \end{aligned}$$

Thus with probability at least  $\frac{7}{1440} - \delta$ ,

$$\left| \left( \mathcal{E}_0(g) - \mathcal{E}_1(g) \right) - \left( \widehat{\mathcal{E}}_0(g, \omega) - \widehat{\mathcal{E}}_1(g, \omega) \right) \right| \geq \frac{1}{25} \sqrt{\frac{\sigma_0^2(g, \omega_0)}{n_0} + \frac{\sigma_1^2(g, \omega_0)}{n_1}}$$

Following the procedure as that of Theorem 2, we can prove that the lower bound have order  $\mathcal{O}((n_0)^{-1/2})$ . Of course, the bound also holds with a low probability.

## C Experiment details

The experiments are run using R (version 3.6.1) on a single 6-Core Intel Core i7 (2.6GHz). We use R package ‘e1071’ (licensed under GPL-2 | GPL-3) for SVM, ‘ranger’ (used for prediction model, licensed under GPL-3) and ‘randomForest’ (used for PS model, licensed under GPL-2 | GPL-3) for random forest and ‘xgboost’ (licensed under Apache License (== 2.0)) for XGB. The ‘randomForest’ is a commonly-used package for random forest and ‘ranger’ provides an efficient implementation for the algorithm, which can be adapted to the learning task in high dimensions. (e.g., the prediction model in the real data experiments).

## **Data Availability**

The de-identified COMPAS dataset is publicly available at <https://github.com/propublica/compas-analysis/blob/master/compas-scores-two-years.csv>. The de-identified ADNI dataset is publicly available at <http://adni.loni.usc.edu/>.
